# Supplementary material for: SOD1-positive aggregate accumulation in the CNS predicts slower disease progression and increased longevity in a mutant SOD1 mouse model of ALS
Source: PubMed Central journal article supplement (PMC6491559; doi:10.1038/s41598-019-43164-z), 2019-04-30
Supplement: 41598_2019_43164_MOESM1_ESM.pdf [file 41598_2019_43164_MOESM1_ESM.pdf]

SOD1-positive aggregate accumulation in the CNS predicts slower disease progression and increased longevity in a mutant SOD1 mouse model of ALS.

Cindy Gill, James P. Phelan, Theo Hatzipetros, Joshua D. Kidd, Valerie R. Tassinari, Beth Levine, Monica Z. Wang, Andrew Moreno, Kenneth Thompson, Marcel Maier, Jan Grimm, Alan Gill, Fernando G. Vieira

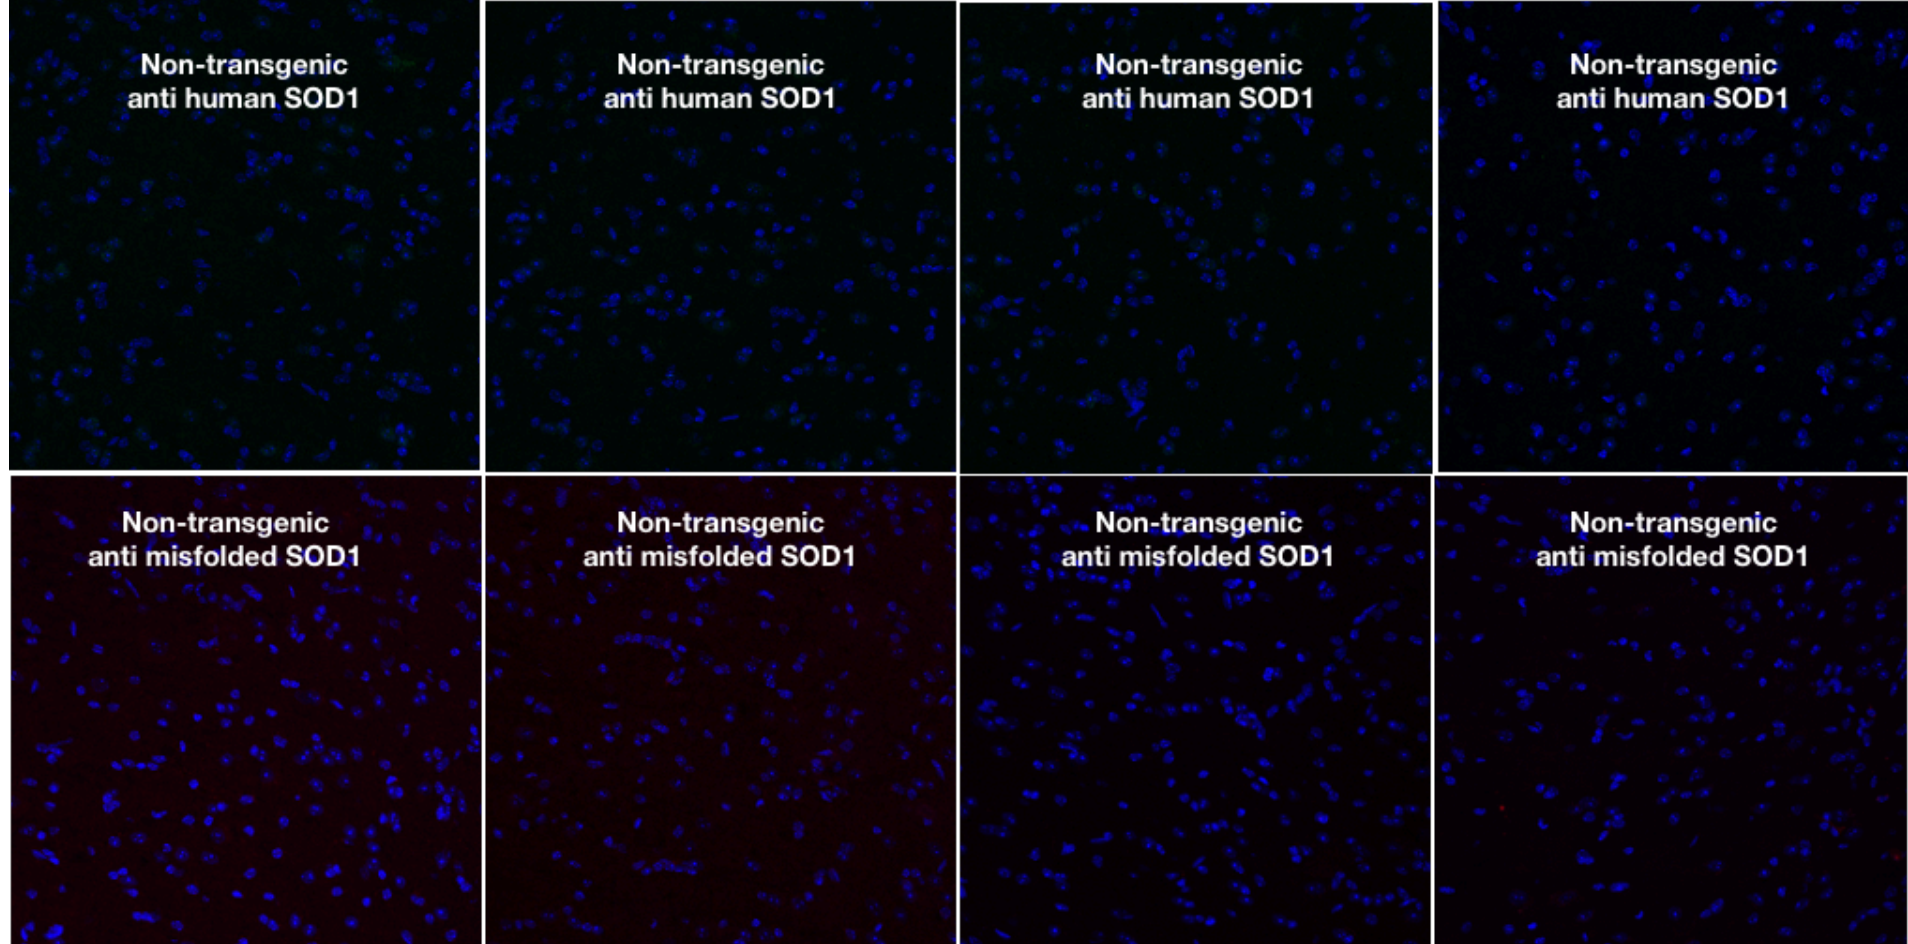

**Supplemental Figure 1:** Non-transgenic lumbar spinal cord samples stained for both human SOD1 and misfolded human SOD1. Each field presents an individual mouse

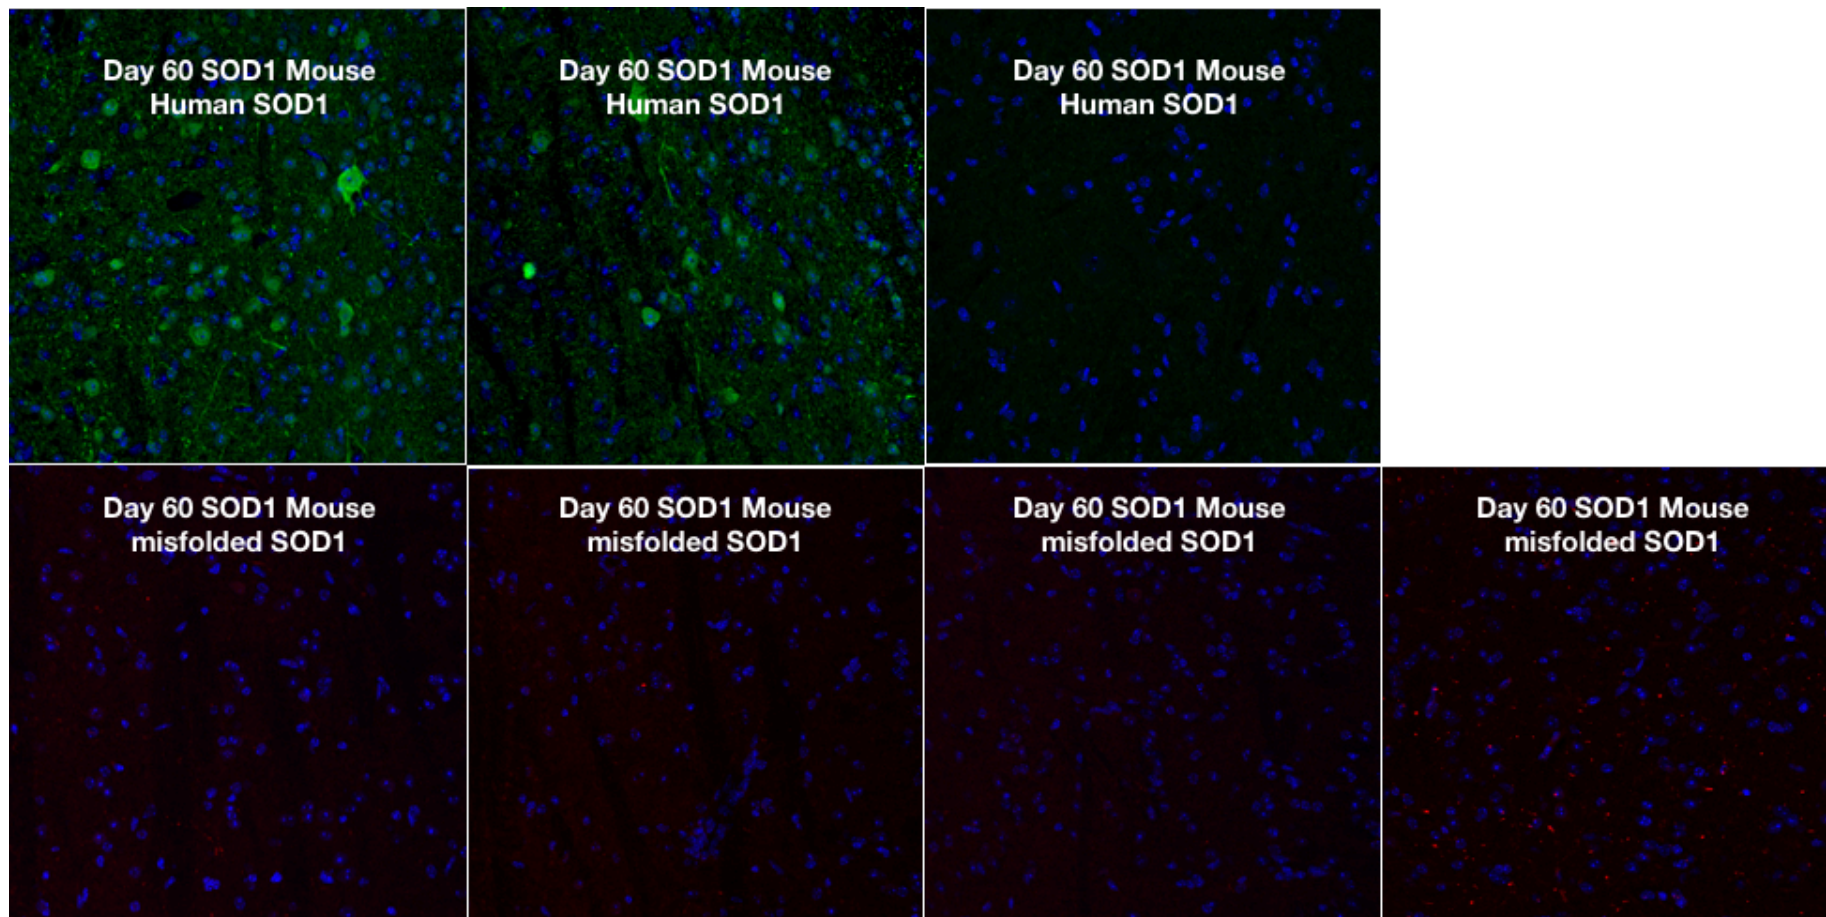

**Supplemental Figure 2:** P60 G93A-SOD1 mouse lumbar spinal cord samples stained for both human SOD1 and misfolded human SOD1. Each field presents an individual mouse



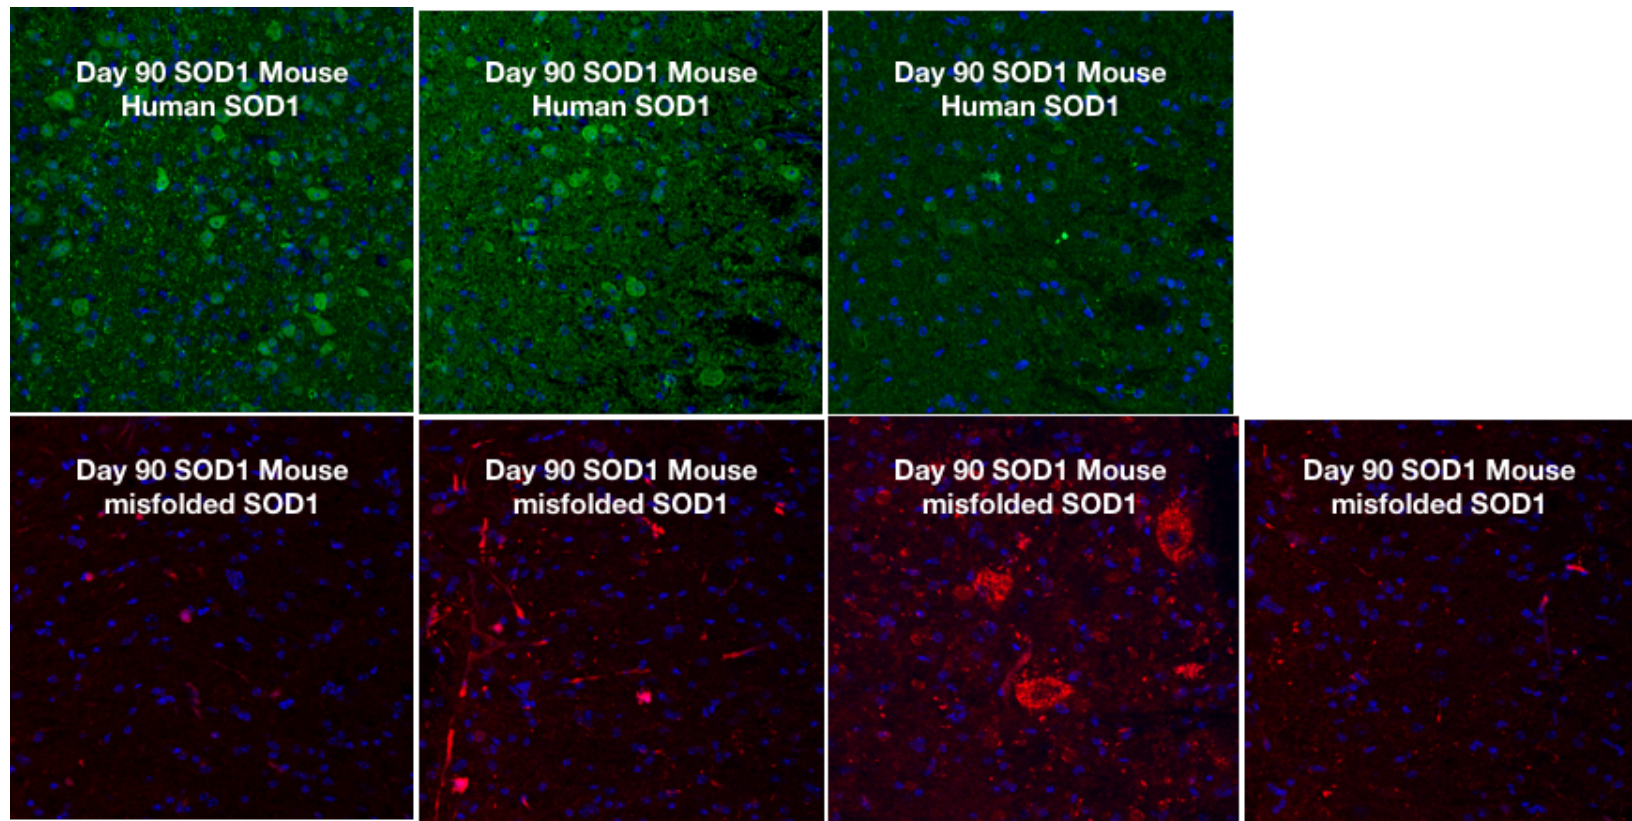

**Supplemental Figure 3:** P90 G93A-SOD1 mouse lumbar spinal cord samples stained for both human SOD1 and misfolded human SOD1. Each field presents an individual mouse

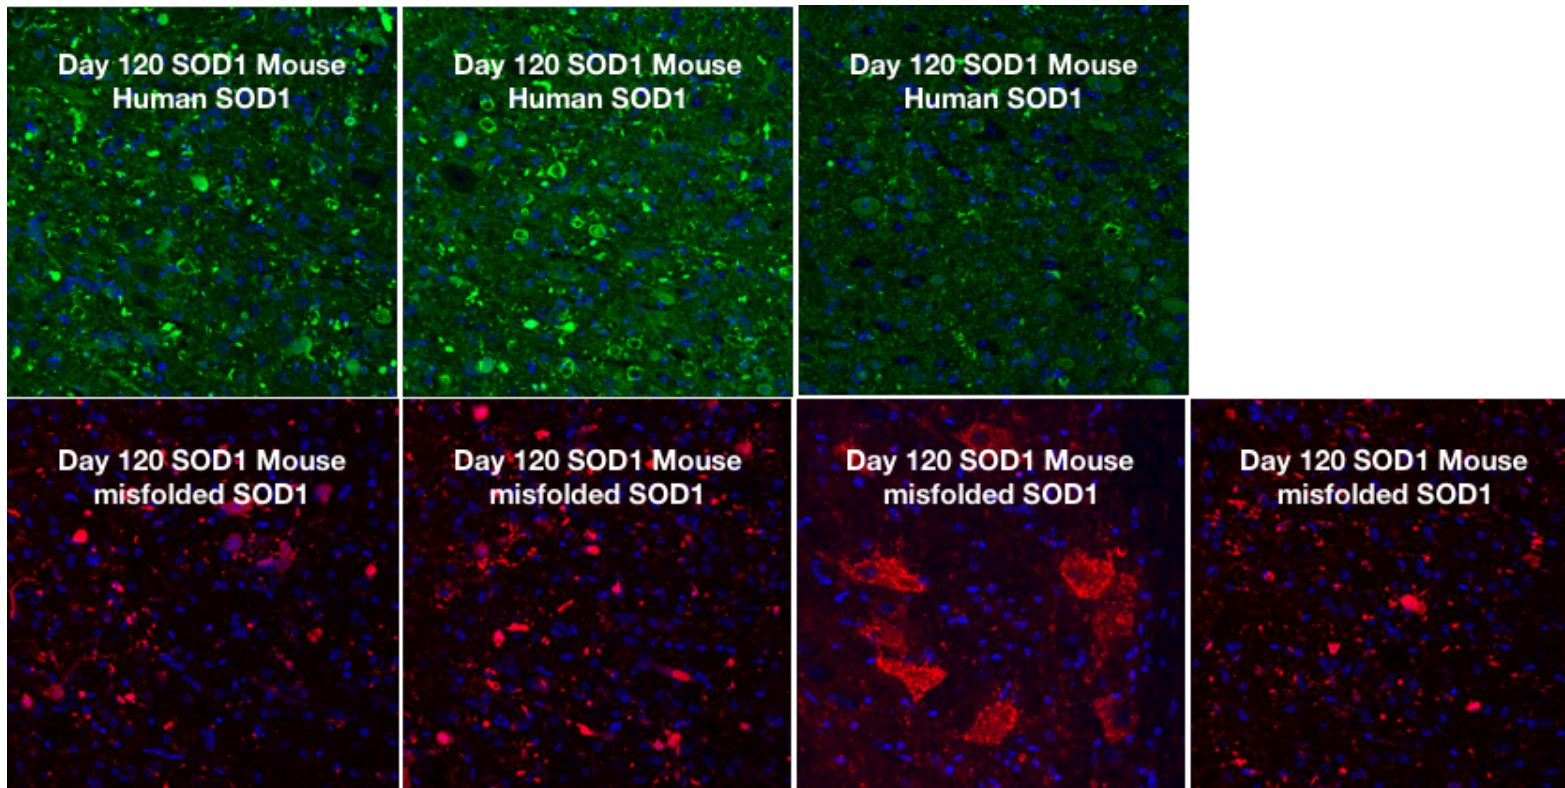

**Supplemental Figure 4:** P120 G93A-SOD1 mouse lumbar spinal cord samples stained for both human SOD1 and misfolded human SOD1. Each field presents an individual mouse

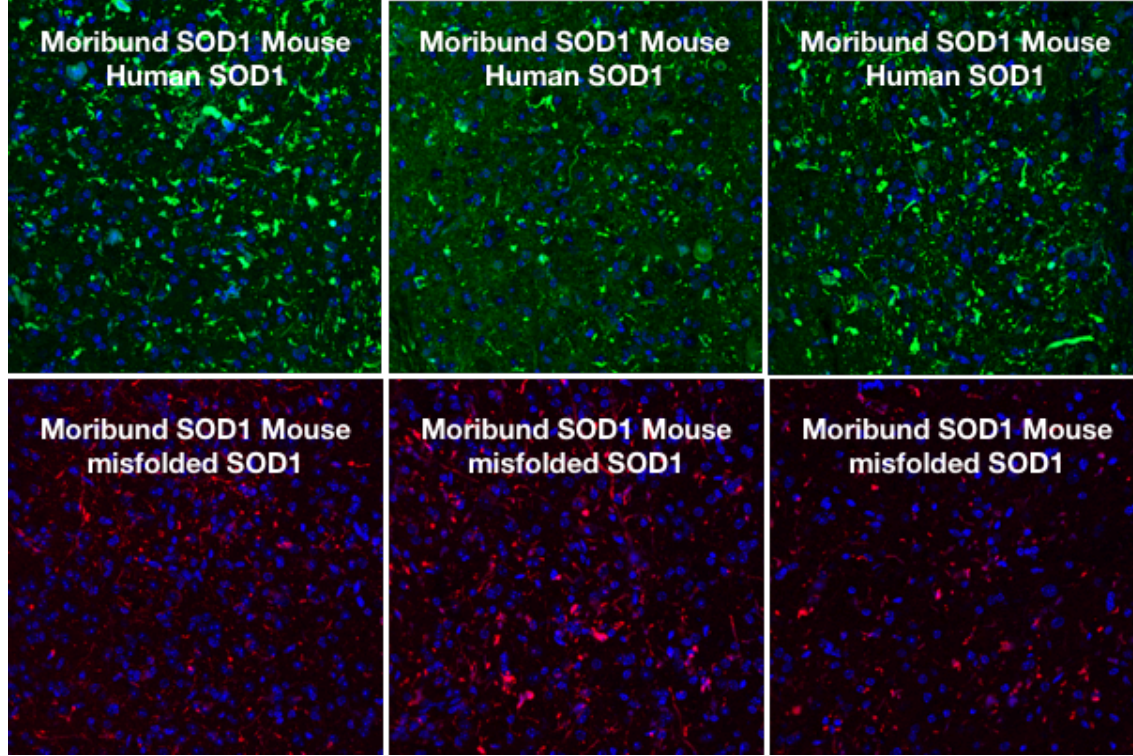

**Supplemental Figure 5:** Moribund G93A-SOD1 mouse lumbar spinal cord samples stained for both human SOD1 and misfolded human SOD1. Each field presents an individual mouse



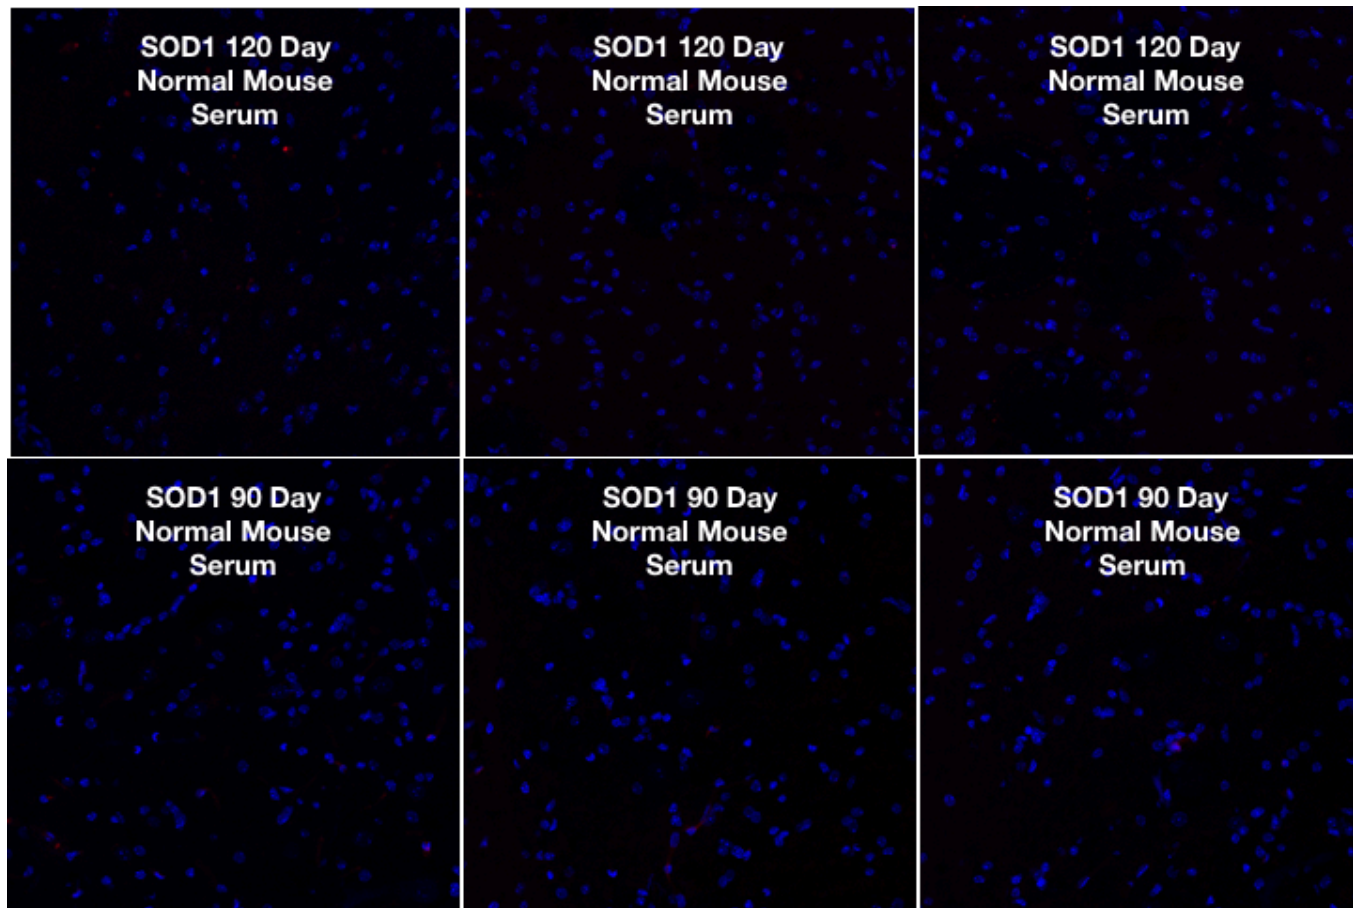

**Supplemental Figure 6:** P90 and 120 G93A-SOD1 mouse lumbar spinal cord stained with normal rat serum and secondary antibody as background controls. Each field presents an individual mouse

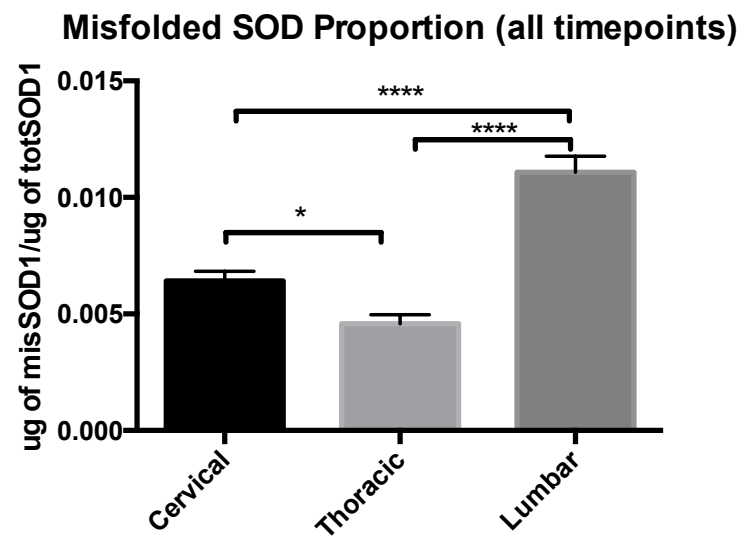

**Supplemental Figure 7:** The mean proportions of total SOD1 that is misfolded in cervical, thoracic, and lumbar spinal cords of G93A-SOD1 mice.



| <b>Supplemental Table 1. Anterior Cortex</b> |            |                  |              |         |  |
|----------------------------------------------|------------|------------------|--------------|---------|--|
| Holm-Sidak's Multiple Comparisons Test       |            |                  |              |         |  |
| Comparison                                   | Mean Diff. | Adjusted P Value | Significant? | Summary |  |
| d70 vs. d100                                 | -0.692     | 0.3514           | No           | ns      |  |
| d70 vs. d120                                 | -0.898     | 0.2391           | No           | ns      |  |
| d70 vs. d130                                 | -2.307     | 0.0038           | Yes          | **      |  |
| d100 vs. d120                                | -0.206     | 0.6506           | No           | ns      |  |
| d100 vs. d130                                | -1.615     | 0.0232           | Yes          | *       |  |
| d120 vs. d130                                | -1.410     | 0.0310           | Yes          | *       |  |

| <b>Supplemental Table 2. Cerebellum</b> |            |                  |              |         |  |
|-----------------------------------------|------------|------------------|--------------|---------|--|
| Holm-Sidak's Multiple Comparisons Test  |            |                  |              |         |  |
| Comparison                              | Mean Diff. | Adjusted P Value | Significant? | Summary |  |
| d70 vs. d100                            | 2.097      | 0.6268           | No           | ns      |  |
| d70 vs. d120                            | -0.836     | 0.6268           | No           | ns      |  |
| d70 vs. d130                            | -2.310     | 0.6063           | No           | ns      |  |
| d100 vs. d120                           | -2.933     | 0.4201           | No           | ns      |  |
| d100 vs. d130                           | -4.407     | 0.1508           | No           | ns      |  |
| d120 vs. d130                           | -1.474     | 0.6268           | No           | ns      |  |

| <b>Supplemental Table 3. Midbrain</b>  |            |                  |              |         |  |
|----------------------------------------|------------|------------------|--------------|---------|--|
| Holm-Sidak's Multiple Comparisons Test |            |                  |              |         |  |
| Comparison                             | Mean Diff. | Adjusted P Value | Significant? | Summary |  |
| d70 vs. d100                           | -0.390     | 0.8981           | No           | ns      |  |
| d70 vs. d120                           | -2.261     | 0.7994           | No           | ns      |  |
| d70 vs. d130                           | -13.000    | 0.0083           | Yes          | **      |  |
| d100 vs. d120                          | -1.871     | 0.7994           | No           | ns      |  |
| d100 vs. d130                          | -12.610    | 0.0085           | Yes          | **      |  |
| d120 vs. d130                          | -10.740    | 0.0094           | Yes          | **      |  |

| <b>Supplemental Table 4. Brainstem</b> |            |                  |              |         |  |
|----------------------------------------|------------|------------------|--------------|---------|--|
| Holm-Sidak's Multiple Comparisons Test |            |                  |              |         |  |
| Comparison                             | Mean Diff. | Adjusted P Value | Significant? | Summary |  |
| d70 vs. d100                           | -4.674     | 0.7248           | No           | ns      |  |
| d70 vs. d120                           | -25.130    | 0.2372           | No           | ns      |  |
| d70 vs. d130                           | -34.330    | 0.1210           | No           | ns      |  |
| d100 vs. d120                          | -20.460    | 0.2652           | No           | ns      |  |
| d100 vs. d130                          | -29.660    | 0.1389           | No           | ns      |  |
| d120 vs. d130                          | -9.199     | 0.6807           | No           | ns      |  |

| <b>Supplemental Table 5. Cervical Spinal Cord</b> |            |                  |              |         |  |
|---------------------------------------------------|------------|------------------|--------------|---------|--|
| Holm-Sidak's Multiple Comparisons Test            |            |                  |              |         |  |
| Comparison                                        | Mean Diff. | Adjusted P Value | Significant? | Summary |  |
| d70 vs. d100                                      | -0.333     | 0.9359           | No           | ns      |  |
| d70 vs. d120                                      | -1.505     | 0.9359           | No           | ns      |  |
| d70 vs. d130                                      | -10.710    | 0.0019           | Yes          | **      |  |
| d100 vs. d120                                     | -1.173     | 0.9359           | No           | ns      |  |
| d100 vs. d130                                     | -10.380    | 0.0030           | Yes          | **      |  |
| d120 vs. d130                                     | -9.208     | 0.0065           | Yes          | **      |  |

| <b>Supplemental Table 6. Thoracic Spinal Cord</b> |            |                  |              |         |  |
|---------------------------------------------------|------------|------------------|--------------|---------|--|
| Holm-Sidak's Multiple Comparisons Test            |            |                  |              |         |  |
| Comparison                                        | Mean Diff. | Adjusted P Value | Significant? | Summary |  |
| d70 vs. d100                                      | 0.185      | 0.8117           | No           | ns      |  |
| d70 vs. d120                                      | -0.502     | 0.7670           | No           | ns      |  |
| d70 vs. d130                                      | -7.488     | < 0.0001         | Yes          | ****    |  |
| d100 vs. d120                                     | -0.687     | 0.7582           | No           | ns      |  |
| d100 vs. d130                                     | -7.672     | < 0.0001         | Yes          | ****    |  |
| d120 vs. d130                                     | -6.985     | < 0.0001         | Yes          | ****    |  |

| <b>Supplemental Table 7. Lumbar Spinal Cord</b> |            |                  |              |         |  |
|-------------------------------------------------|------------|------------------|--------------|---------|--|
| Holm-Sidak's Multiple Comparisons Test          |            |                  |              |         |  |
| Comparison                                      | Mean Diff. | Adjusted P Value | Significant? | Summary |  |
| d70 vs. d100                                    | -0.333     | 0.9359           | No           | ns      |  |
| d70 vs. d120                                    | -1.505     | 0.9359           | No           | ns      |  |
| d70 vs. d130                                    | -10.710    | 0.0019           | Yes          | **      |  |
| d100 vs. d120                                   | -1.173     | 0.9359           | No           | ns      |  |
| d100 vs. d130                                   | -10.380    | 0.0030           | Yes          | **      |  |
| d120 vs. d130                                   | -9.208     | 0.0065           | Yes          | **      |  |

**Supplemental Table 8.** All Tissue Types, All Time Points Pooled

Holm-Sidak's Multiple Comparisons Test

| Comparison                                    | Mean Diff. | Adjusted P Value | Significant? | Summary |
|-----------------------------------------------|------------|------------------|--------------|---------|
| Anterior Cortex vs. Cerebellum                | -2.525     | 0.9851           | No           | ns      |
| Anterior Cortex vs. Midbrain                  | -4.229     | 0.9230           | No           | ns      |
| Anterior Cortex vs. Brain Stem                | -24.880    | < 0.0001         | Yes          | ****    |
| Anterior Cortex vs. Cervical Spinal Cord      | -5.262     | 0.4059           | No           | ns      |
| Anterior Cortex vs. Thoracic Spinal Cord      | -1.661     | 0.9851           | No           | ns      |
| Anterior Cortex vs. Lumbar Spinal Cord        | -3.086     | 0.9409           | No           | ns      |
| Cerebellum vs. Midbrain                       | -1.704     | 0.9888           | No           | ns      |
| Cerebellum vs. Brain Stem                     | -22.35     | < 0.0001         | Yes          | ****    |
| Cerebellum vs. Cervical Spinal Cord           | -2.738     | 0.9626           | No           | ns      |
| Cerebellum vs. Thoracic Spinal Cord           | 0.864      | 0.9888           | No           | ns      |
| Cerebellum vs. Lumbar Spinal Cord             | -0.561     | 0.9888           | No           | ns      |
| Midbrain vs. Brain Stem                       | -20.65     | < 0.0001         | Yes          | ****    |
| Midbrain vs. Cervical Spinal Cord             | -1.034     | 0.9888           | No           | ns      |
| Midbrain vs. Thoracic Spinal Cord             | 2.568      | 0.9700           | No           | ns      |
| Midbrain vs. Lumbar Spinal Cord               | 1.143      | 0.9888           | No           | ns      |
| Brain Stem vs. Cervical Spinal Cord           | 19.62      | < 0.0001         | Yes          | ****    |
| Brain Stem vs. Thoracic Spinal Cord           | 23.22      | < 0.0001         | Yes          | ****    |
| Brain Stem vs. Lumbar Spinal Cord             | 21.79      | < 0.0001         | Yes          | ****    |
| Cervical Spinal Cord vs. Thoracic Spinal Cord | 3.602      | 0.4165           | No           | ns      |
| Cervical Spinal Cord vs. Lumbar Spinal Cord   | 2.177      | 0.9409           | No           | ns      |
| Thoracic Spinal Cord vs. Lumbar Spinal Cord   | -1.425     | 0.9851           | No           | ns      |
